# Supplementary material for: Gene expression analyses in maize inbreds and hybrids with varying levels of heterosis
Source: PubMed Central journal article supplement (PMC2365949; doi:10.1186/1471-2229-8-33), 2008-04-10
Supplement: 1471-2229-8-33-S8.pdf [file 1471-2229-8-33-S8.pdf]

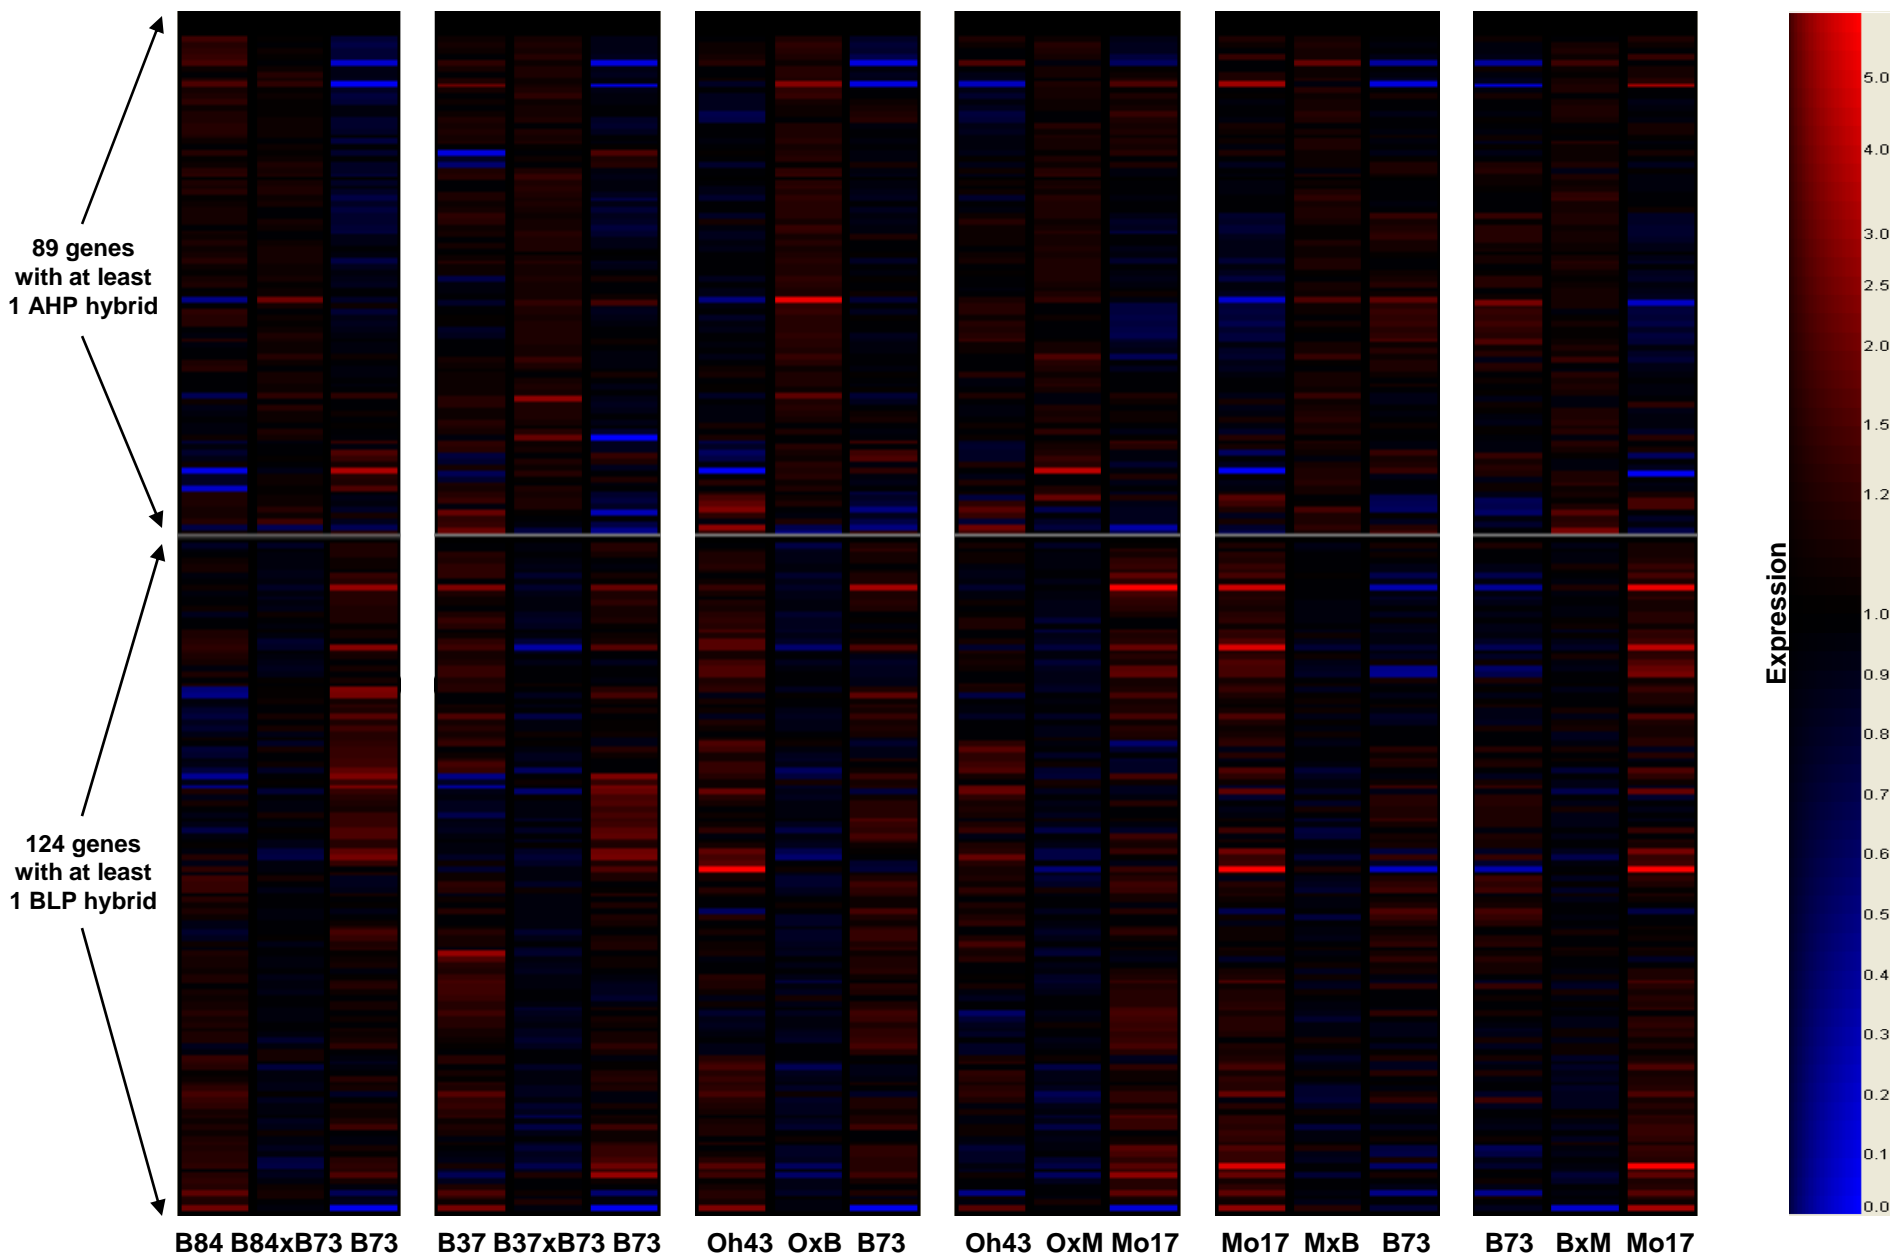

**Additional file 8. Clustering analysis of genes with AHP and BLP profiles.** Heat map clusters depicting the expression levels of genes in the Affymetrix dataset showing evidence for AHP or BLP expression in at least one inbred-hybrid group. The 213 genes determined to be AHP or BLP in at least one inbred-hybrid combination using liberal statistical thresholds (FDR < 0.15, and d/a value either greater than 1.0 or less than -1.0) are shown. Red indicates high relative expression and blue indicates low relative expression, while black indicates the average relative expression for each gene profile. The d/a values and statistical significance tests among the six inbred-hybrid groups are shown for each of these genes in Additional file 7.
